# Supplementary material for: Increase in Intimate Partner Violence among women and men during the COVID19 pandemic likely due to the lockdown in Uganda: a household survey
Source: Research Square preprint supplement (doi:10.21203/rs.3.rs-5514997/v1), 2025-04-03
Supplement: Supplementary file 1 [file b992ba977b4754fd4c2d1c34.docx]

**Household Survey Questionnaire – Intimate Partner Violence component.**

| **Tool I** |  | |
| --- | --- | --- |
| S1. Interviewer initials_________ | S2. Survey unique ID:__________ | S3. Date:________/____/_____ |
| S4. District  Luwero  Mukono |  |  |

| **A Background Information** | | | | |
| --- | --- | --- | --- | --- |
| A1 | Village name |  |  |  |
| A2 | Parish |  |  |  |
| A3 | Sub county |  |  |  |
| A4 | Age of respondent |  |  |  |
| A5 | Gender | Male |  | 1 |
| Female |  | 2 |
| A6 | Role of respondent in household | Wife/mother |  | 1 |
| Guardian |  | 2 |
| Husband/father |  | 3 |
| Other (specify) |  | 4 |
| A7 | Highest level of education | None |  | 1 |
| Primary |  | 2 |
| Secondary |  | 3 |
| Certificate |  | 4 |
| Diploma |  | 5 |
| Degree |  | 6 |
| Other (specify) |  | 7 |
| A8 | Occupation | None |  | 1 |
| Subsistence farmer |  | 2 |
| Self employed |  | 3 |
| Civil servant |  | 4 |
| Other (specify) |  | 5 |
| A9 | Marital status | Never married |  | 1 |
| Married |  | 2 |
| Cohabiting |  | 3 |
| Separated/divorced |  | 4 |
| Widowed |  | 5 |
| A10 | Age of your spouse at last birthday |  |  |  |
| Don’t know |  | 999 |
| A11 | Highest level of education of spouse | None |  | 1 |
| Primary |  | 2 |
| Secondary |  | 3 |
| Certificate |  | 4 |
| Diploma |  | 5 |
| Degree |  | 6 |
| Other (specify) |  | 7 |
| Don’t know |  | 99 |
| A12 | Occupation of spouse | None |  | 1 |
| Subsistence farmer |  | 2 |
| Self employed |  | 3 |
| Civil servant |  | 4 |
| Other (specify) |  | 5 |
| Don’t know |  | 9 |
| A13 | Who is the head of the household?  ***If head of household is self or spouse, skip next three questions*** | Self |  | 1 |
| Spouse |  | 2 |
| Other male adult |  | 3 |
| Other female adult |  | 4 |
| A14 | Age of head of household |  |  |  |
| Don’t know |  | 999 |
| A15 | Highest level of education of household head | None |  | 1 |
| Primary |  | 2 |
| Secondary |  | 3 |
| Certificate |  | 4 |
| Diploma |  | 5 |
| Degree |  | 6 |
| Other (specify) |  | 7 |
| Don’t know |  | 99 |
| A16 | Occupation of household head | None |  | 1 |
| Subsistence farmer |  | 2 |
| Self employed |  | 3 |
| Civil servant |  | 4 |
| Other (specify) |  | 5 |
| Don’t know |  | 99 |
| **B Socio-economic status** | | |  |  |
| B1 | Who owns the house where you live? | Household |  | 1 |
| Rented |  | 2 |
| Relative/pays no rent |  | 3 |
| Employer |  | 4 |
| Other (specify) |  | 5 |
| B2 | Does your household have electricity? | Yes |  | 1 |
| No |  | 0 |
| B3 | Main material of floor of the house (Observe) | Concrete cement/Cement screed |  | 1 |
| Hard earth/sand |  | 2 |
| Wood |  | 3 |
| Other (specify) |  | 4 |
| B4 | Main material of the exterior walls of the household? | Cement |  | 1 |
| Mud |  | 2 |
| Burnt bricks with cement |  | 3 |
| Burnt bricks with mud |  | 4 |
| Iron sheets |  | 5 |
| Other wall material (specify) |  | 6 |
| B5 | Main material of the roof of the household? | Thatch/palm leaf |  | 1 |
| Iron sheets |  | 2 |
| Other roof material (specify) |  | 3 |
| B6 | Main type of fuel that you use for cooking at this household | Electric stove |  | 1 |
| Gas stove |  | 2 |
| Kerosene stove |  | 3 |
| Charcoal |  | 4 |
| Firewood |  | 5 |
| Other (specify) |  | 6 |
| B7 | Does your household/any member of your household own a functioning: | | | |
| B7i | Radio cassette/CD/DVD player | Yes |  | 1 |
| No |  | 0 |
| B7ii | Television | Yes |  | 1 |
| No |  | 0 |
| B7iii | Bicycle | Yes |  | 1 |
| No |  | 0 |
| B7iv | Motorbike | Yes |  | 1 |
| No |  | 0 |
| B7v | Car | Yes |  | 1 |
| No |  | 0 |
| B7vi | Mobile phone | Yes |  | 1 |
| No |  | 0 |
| B7vii | Sofa set? | Yes |  | 1 |
| No |  | 0 |
| B7viii | Cupboard | Yes |  | 1 |
| No |  | 0 |
| B8 | Does any member of your household have a bank account, mobile money account, or account with an agent? | Yes |  | 1 |
| No |  | 0 |

| **G. Experience of SGBV during the lockdown** | | | | |
| --- | --- | --- | --- | --- |
| G0. | Do you currently have, or have you ever had an intimate partner? | | | 1. Yes  2. No |
| The next questions are about things that happen to many people, and that your current partner or any other partner may have done to you. I want you to tell me if your current partner or any other partner has ever done the following things to you. | | 1. If YES, continue with B | 1. Has this happened in the past 12 months? (If YES continue to C) | 1. Did this happen more or get worse during the COVID-19 lockdown? |
| **Emotional violence** | | | |  |
|  | Insulted or made you feel bad about yourself? | 1. Yes 2. No | 1. Yes 2. No | 1. Yes 2. No |
|  | Belittled you or humiliated you in front of other people? | 1. Yes 2. No | 1. Yes 2. No | 1. Yes 2. No |
|  | Did things to scare or intimidate you on purpose for example by the way that s/he looked at you, by yelling or smashing things? | 1. Yes 2. No | 1. Yes 2. No | 1. Yes 2. No |
|  | Threatened to hurt someone you care about? | 1. Yes 2. No | 1. Yes 2. No | 1. Yes 2. No |
| **Socio-economic violence**  I want you to tell me if any of the following have ever been done to you. | | | | |
|  | Being denied access to support services such as education, health assistance/services (eg contraceptives) or remunerated employment because of your gender? | 1. Yes 2. No | 1. Yes 2. No | 1. Yes 2. No |
|  | Being denied property rights because of your gender? | 1. Yes 2. No | 1. Yes 2. No | 1. Yes 2. No |
|  | Your current/former partner prohibited you from getting a job, going to work, trading or earning money? | 1. Yes 2. No | 1. Yes 2. No |  |
|  | Your current/former partner took your earnings against your will? | 1. Yes 2. No | 1. Yes 2. No | 1. Yes 2. No |
| **Physical violence by an intimate partner**  I want you to tell me if your current partner or any other partner has ever done the following things to you. | | | | |
|  | Slapped or thrown something at you that could hurt you? | 1. Yes 2. No | 1. Yes 2. No | 1. Yes 2. No |
|  | Pushed or shoved you? | 1. Yes 2. No | 1. Yes 2. No | 1. Yes 2. No |
|  | Hit you with their fist or something else that would hurt you? | 1. Yes 2. No | 1. Yes 2. No | 1. Yes 2. No |
|  | Kicked, dragged or beaten you up? | 1. Yes 2. No | 1. Yes 2. No | 1. Yes 2. No |
|  | Chocked or burnt you on purpose? | 1. Yes 2. No | 1. Yes 2. No | 1. Yes 2. No |
|  | Threatened to use or actually used a gun, knife or other weapon against you? | 1. Yes 2. No | 1. Yes 2. No | 1. Yes 2. No |
| **Sexual violence**  I want you to tell me if any of the following have been done to you: | | | | |
|  | Being physically forced to have sexual intercourse when you did not want to? | 1. Yes 2. No | 1. Yes 2. No |  |
|  | Had sexual intercourse when you did not want to because you were afraid of what your partner might do? | 1. Yes 2. No | 1. Yes 2. No | 1. Yes 2. No |
|  | Been forced to do something sexual that you found degrading or humiliating. | 1. Yes 2. No | 1. Yes 2. No | 1. Yes 2. No |
| **Service utilization for the violence experienced** | | | | |
|  | Did you seek help for any incident of the violence experienced in the past 12 months? | 1. Yes  2. No | | |
|  | Who/where did you seek help?  *(Select all that apply)* | 1. Police 2. Public health facility 3. Private clinic or hospital 4. Pharmacy 5. Drug shop 6. Social services 7. Legal advice center 8. Court 9. Local leader 10. Non-governmental Organization 11. 9. Religious leader 12. 10. Family member 13. 11. Other (Specify) | | |
|  | If no help was sought, what was the main reason that stopped you from getting help? | 1. Don’t know 2. Fear of threats/consequences/more violence 3. Violence normal/not serious 4. Embarrassed/ashamed/afraid would not be believed or would be blamed 5. Knew other victims who were not helped 6. Afraid it would end the relationship 7. Afraid would lose children 8. Bring bad name to family 9. Lack of money for transport 10. Transport challenges due to the lockdown 11. Charges were too high 12. Curfew 13. Facilities were closed 14. Other (Specify) | | |
|  | Did you receive help for any incident of violence you sought care for? | 1. Yes  2. No | | |
